# Supplementary material for: Facile synthesis of a novel polymeric ionic liquid gel and its excellent performance for hexavalent chromium removal
Source: Royal Society of Chemistry journal article supplement (doi:10.1039/c5dt00101c), 2015-01-01
Supplement: c5dt00101c1.pdf [file c5dt00101c1.pdf]

Supplementary Material (ESI) for Dalton Transactions

## **Facile synthesis of a novel polymeric ionic liquid gel and its excellent performance for hexavalent chromium removal**

Shuojue Wang,<sup>a</sup> Hui-Ling M,<sup>a, b</sup> Jing Peng,<sup>a</sup> Youwei Zhang,<sup>a</sup> Jian Chen,<sup>a</sup> Liangliang Wang,<sup>a</sup> Ling Xu,<sup>c</sup> Jiuqiang Li<sup>a</sup> and Maolin Zhai\*<sup>a</sup>

<sup>a</sup> *Beijing National Laboratory for Molecular Sciences, Radiochemistry and Radiation Chemistry Key Laboratory of Fundamental Science, the Key Laboratory of Polymer Chemistry and Physics of the Ministry of Education, College of Chemistry and Molecular Engineering, Peking University, Beijing 100871, China*

<sup>b</sup> *Beijing Key Laboratory of Radiation Advanced Materials, Beijing Research Center for Radiation Application, Beijing 100015, China*

<sup>c</sup> *Department of Energy and Resources Engineering, College of Engineering, Peking University, Beijing 100871, P. R. China*

---

\*Corresponding author. Tel/Fax: +86-10-62753794; Email: [mlzhai@pku.edu.cn](mailto:mlzhai@pku.edu.cn)



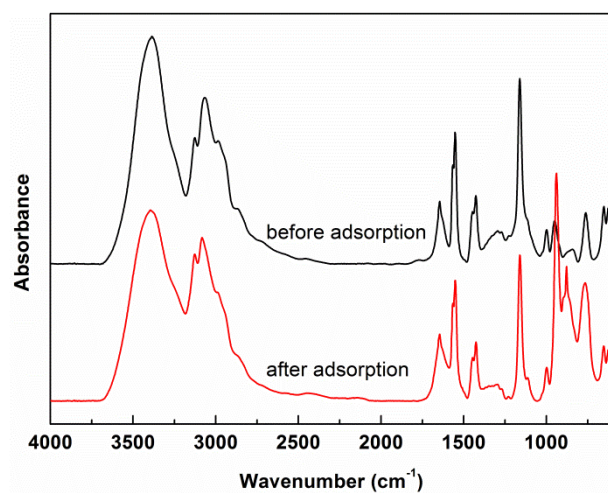

**Fig. S1** Micro-FTIR spectra of PIL gel before and after adsorption of Cr(VI).

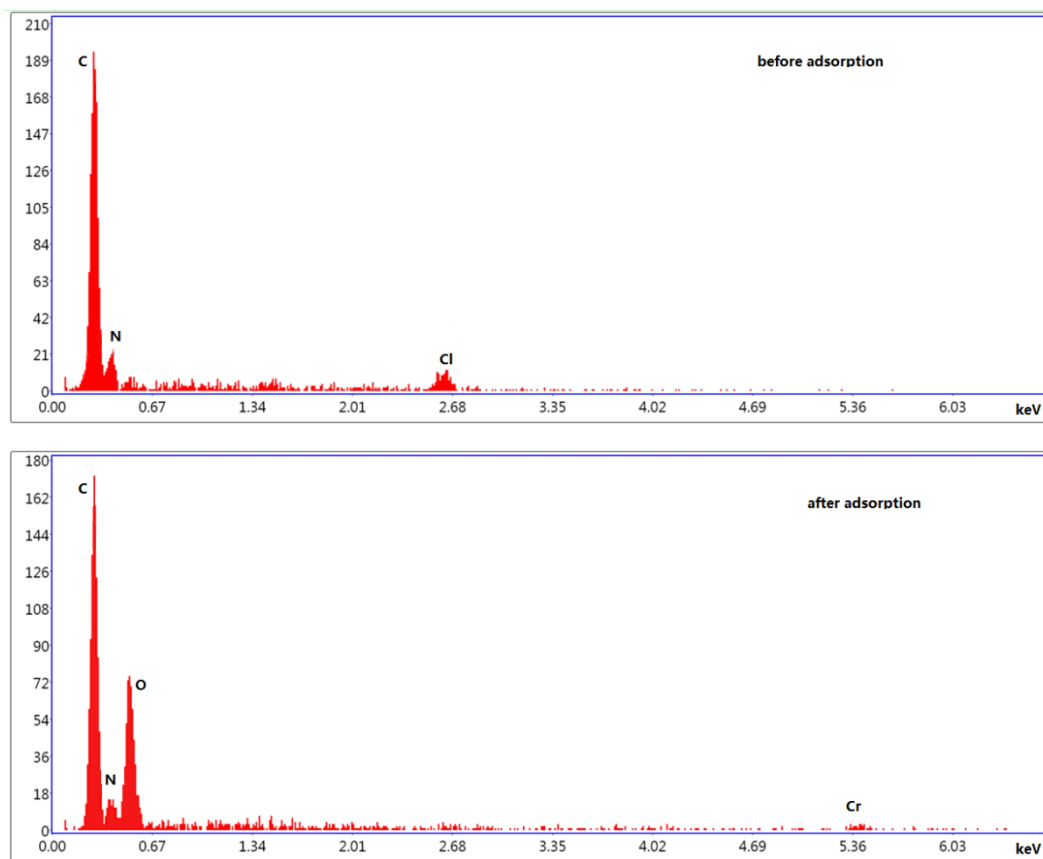

**Fig. S2** EDX spectra of PIL gel before and after adsorption of Cr(VI).

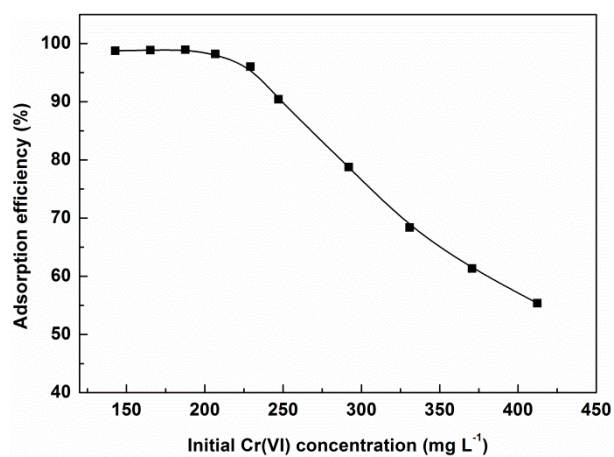

**Fig. S3** Effect of initial Cr(VI) concentration on the adsorption efficiency.

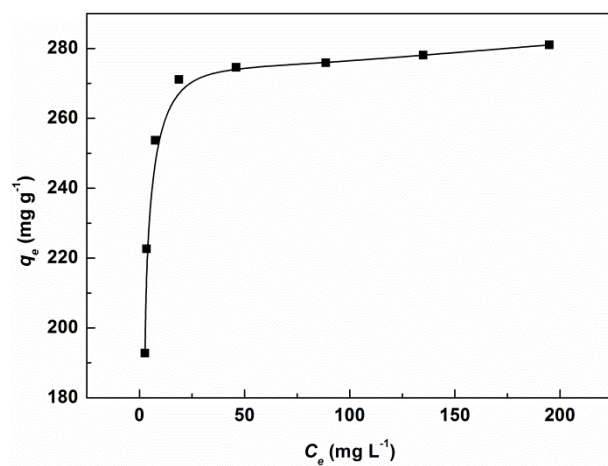

**Fig. S4** Adsorption isotherm of PIL gel prepared at 220 kGy. (pH = 4.6 ± 0.2)

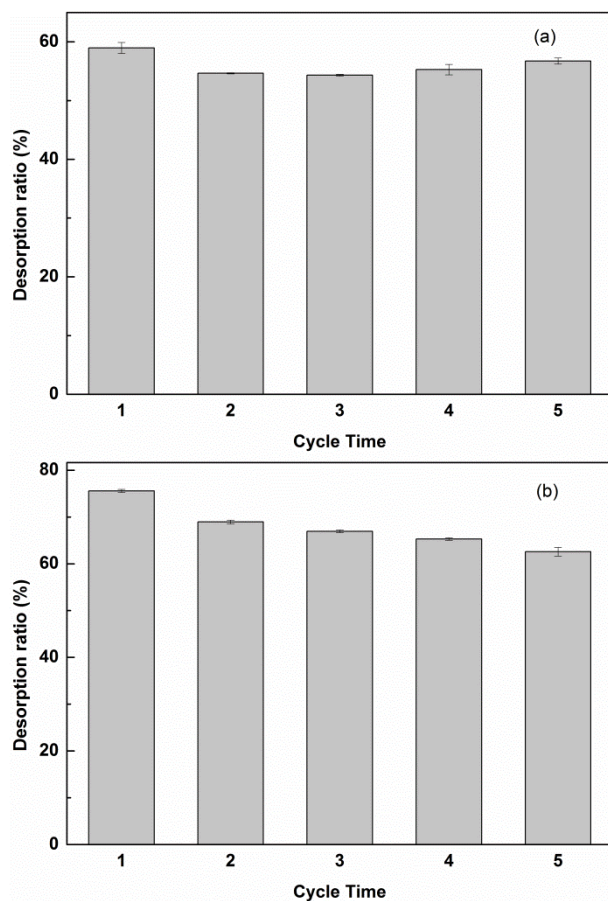

**Fig. S5** The desorption ratio after each cycle using (a) NaCl solution and (b) NaOH solution to desorb Cr(VI) from PIL gel. The desorption ratio was calculated based on the mass of Cr(VI) released into the solution and the mass of Cr(VI) accumulated in the gel before desorption.
